# Supplementary material for: A bacterial antirepressor with SH3 domain topology mimics operator DNA in sequestering the repressor DNA recognition helix
Source: PubMed Central journal article supplement — Nucleic Acids Res. 2010 Apr 21;38(15):5226–41. doi: 10.1093/nar/gkq277 (PMC2926617; doi:10.1093/nar/gkq277), 2010-04-21
Supplement: gkq277_1.pdf [file gkq277_1.pdf]

## **SUPPLEMENTAL DATA**

### **A bacterial antirepressor with SH3 domain topology mimics operator DNA in sequestering the repressor DNA recognition helix**

Esther León<sup>1</sup>, Gloria Navarro-Avilés<sup>2</sup>, Clara M. Santiveri<sup>1</sup>, Cesar Flores-Flores<sup>2</sup>,  
Manuel Rico<sup>1</sup>, Carlos González<sup>1</sup>, Francisco José Murillo<sup>2</sup>, Montserrat Elías-Arnanz<sup>2</sup>,  
María Angeles Jiménez<sup>1</sup>, and S. Padmanabhan<sup>1</sup>

<sup>1</sup>*Instituto de Química-Física “Rocasolano”, Consejo Superior de Investigaciones Científicas (CSIC), 119 Serrano, Madrid 28006, Spain*

<sup>2</sup>*Departamento de Genética y Microbiología, Unidad Asociada al CSIC, Facultad de Biología, Universidad de Murcia, Murcia 30071, Spain*

**Supplementary Table S1. Strains and plasmids used in this work**

| Strain or plasmid                | Relevant phenotype                 | Genotype or description                                                                                                                                                           | Source or reference |
|----------------------------------|------------------------------------|-----------------------------------------------------------------------------------------------------------------------------------------------------------------------------------|---------------------|
| <b><i>M. xanthus</i> strains</b> |                                    |                                                                                                                                                                                   |                     |
| DK1050                           | Car <sup>+</sup>                   | Wild-type                                                                                                                                                                         | (1)                 |
| MR1776*                          | Car <sup>-</sup>                   | $\Delta carS$                                                                                                                                                                     | pMR3184 x DK1050    |
| MR1935*                          | Car <sup>+</sup> , Km <sup>R</sup> | $carS'$ (encodes CarS with non-native R-I-L following M1)/<br>$\Delta carS$                                                                                                       | pMR3233 x MR1776    |
| MR1936*                          | Car <sup>-</sup> , Km <sup>R</sup> | $carS'(D52A/D53A) / \Delta carS$                                                                                                                                                  | pMR3234 x MR1776    |
| MR1937*                          | Car <sup>-</sup> , Km <sup>R</sup> | $carS'(E79A/E80A) / \Delta carS$                                                                                                                                                  | pMR3235 x MR1776    |
| MR1938*                          | Car <sup>-</sup> , Km <sup>R</sup> | $carS'(L63A) / \Delta carS$                                                                                                                                                       | pMR3267 x MR1776    |
| MR1939*                          | Car <sup>-</sup> , Km <sup>R</sup> | $carS'(L75A) / \Delta carS$                                                                                                                                                       | pMR3264 x MR1776    |
| MR1940*                          | Car <sup>-</sup> , Km <sup>R</sup> | $carS'(F77A) / \Delta carS$                                                                                                                                                       | pMR3268 x MR1776    |
| <b>Plasmids</b>                  |                                    |                                                                                                                                                                                   |                     |
| pET15b                           | Amp <sup>R</sup>                   | Vector for overexpression of H <sub>6</sub> -tagged protein.                                                                                                                      | Novagen             |
| pBJ114                           | Km <sup>R</sup> Gal <sup>S</sup>   | Vector to generate gene deletions/mutations in <i>M. xanthus</i> .                                                                                                                | (2)                 |
| pEG202                           | Amp <sup>R</sup> HIS3              | Vector for expressing N-terminal fusions to the LexA DNA-binding domain (DBD) under the control of ADH1 promoter for yeast two-hybrid analysis.                                   | (3)                 |
| pJG4-5                           | Amp <sup>R</sup> TRP1              | Vector for expressing N-terminal fusions to the B42 transcriptional activation domain (TAD) under control of the galactose-inducible GAL1 promoter for yeast two-hybrid analysis. | (3)                 |
| pSH18-34                         | Amp <sup>R</sup> URA3<br>lacZ      | <i>lacZ</i> under the control of a GAL10-8 LexA-GAL promoter region.<br>Reporter for yeast two-hybrid analysis.                                                                   | (3)                 |
| pMAR975                          | Km <sup>R</sup> Gal <sup>S</sup>   | pBJ114 derivative lacking an <i>EcoRI</i> site                                                                                                                                    | (4)                 |
| pMR2606                          | Amp <sup>R</sup> TRP1              | pJG4-5 derivative for expressing CarS fused to B42-TAD                                                                                                                            | (5)                 |
| pMR2609                          | Amp <sup>R</sup> HIS3              | pEG202 derivative for expressing CarA fused to LexA DBD                                                                                                                           | (5)                 |
| pMR3125                          | Amp <sup>R</sup>                   | pET15b derivative for overexpression of H <sub>6</sub> -CarS(D52A/D53A)                                                                                                           | This work           |
| pMR3126                          | Amp <sup>R</sup>                   | pET15b derivative for overexpression of H <sub>6</sub> -CarH(Nter)(R27A)                                                                                                          | This work           |
| pMR3138                          | Amp <sup>R</sup> TRP1              | pJG4-5 derivative for expressing CarS(E31A/D32A) fused to B42-TAD                                                                                                                 | This work           |
| pMR3139                          | Amp <sup>R</sup> TRP1              | pJG4-5 derivative for expressing CarS(D52A/D53A) fused to B42-TAD                                                                                                                 | This work           |
| pMR3140                          | Amp <sup>R</sup> TRP1              | pJG4-5 derivative for expressing CarS(D60A/D61A) fused to B42-TAD                                                                                                                 | This work           |
| pMR3141                          | Amp <sup>R</sup> TRP1              | pJG4-5 derivative for expressing CarS(E73A/D74A) fused to B42-TAD                                                                                                                 | This work           |
| pMR3142                          | Amp <sup>R</sup> TRP1              | pJG4-5 derivative for expressing CarS(E79A/E80A) fused to B42-TAD                                                                                                                 | This work           |
| pMR3155                          | Amp <sup>R</sup> TRP1              | pJG4-5 derivative for expressing CarS(D12A/D14A) fused to B42-TAD                                                                                                                 | This work           |
| pMR3156                          | Amp <sup>R</sup> TRP1              | pJG4-5 derivative for expressing CarS(E69A) fused to B42-TAD                                                                                                                      | This work           |
| pMR3179                          | Amp <sup>R</sup> TRP1              | pJG4-5 derivative for expressing CarS(D4A) fused to B42-TAD                                                                                                                       | This work           |
| pMR3180                          | Amp <sup>R</sup> TRP1              | pJG4-5 derivative for expressing CarS(E82A) fused to B42-TAD                                                                                                                      | This work           |
| pMR3181                          | Amp <sup>R</sup> TRP1              | pJG4-5 derivative for expressing CarS(E86A) fused to B42-TAD                                                                                                                      | This work           |
| pMR3184                          | Km <sup>R</sup> Gal <sup>S</sup>   | pMAR975 with the $\Delta carS$ allele used to generate $carS$ -deleted <i>M. xanthus</i>                                                                                          | This work           |
| pMR3233                          | Km <sup>R</sup> Gal <sup>S</sup>   | pMR3184 with $carS'$ introduced into the <i>EcoRI</i> site.                                                                                                                       | This work           |
| pMR3234                          | Km <sup>R</sup> Gal <sup>S</sup>   | pMR3184 with $carS'(D52A/D53A)$ introduced into the <i>EcoRI</i> site.                                                                                                            | This work           |
| pMR3235                          | Km <sup>R</sup> Gal <sup>S</sup>   | pMR3184 derivative with $carS'(E79A/E80A)$ introduced into <i>EcoRI</i> site.                                                                                                     | This work           |
| pMR3249                          | Amp <sup>R</sup>                   | pET15b derivative for overexpression of H <sub>6</sub> -CarS(F77A)                                                                                                                | This work           |
| pMR3261                          | Amp <sup>R</sup> TRP1              | pJG4-5 derivative for expressing CarS(F77A) fused to B42-TAD                                                                                                                      | This work           |
| pMR3262                          | Amp <sup>R</sup> TRP1              | pJG4-5 derivative for expressing CarS(L75A) fused to B42-TAD                                                                                                                      | This work           |
| pMR3263                          | Amp <sup>R</sup> TRP1              | pJG4-5 derivative for expressing CarS(L63A) fused to B42-TAD                                                                                                                      | This work           |
| pMR3264                          | Km <sup>R</sup> Gal <sup>S</sup>   | pMR3184 derivative with $carS'(L75A)$ introduced into the <i>EcoRI</i> site.                                                                                                      | This work           |
| pMR3267                          | Km <sup>R</sup> Gal <sup>S</sup>   | pMR3184 derivative with $carS'(L63A)$ introduced into the <i>EcoRI</i> site.                                                                                                      | This work           |
| pMR3268                          | Km <sup>R</sup> Gal <sup>S</sup>   | pMR3184 derivative with $carS'(F77A)$ introduced into the <i>EcoRI</i> site.                                                                                                      | This work           |

\* Generated in this study as described in SI Materials and methods. Car<sup>+</sup>: wild-type phenotype for light-induced carotenogenesis; Car<sup>-</sup>: null phenotype for light-induced carotenogenesis.

**Supplementary Table S2. NMR data and structural statistics for the final structures of CarS1**

---

|                                                 |                 |
|-------------------------------------------------|-----------------|
| Total number of NOE distance constraints        | 968             |
| Intraresidue ( $i-j=0$ )                        | 287             |
| Sequential ( $ i-j =1$ )                        | 246             |
| Medium-range ( $2 \leq  i-j  \leq 1$ )          | 105             |
| Long-range ( $ i-j  \geq 5$ )                   | 330             |
| Dihedral angle constraints (TALOS)              |                 |
| Total ( $\phi, \psi$ )                          | 141             |
| Pairwise root mean square deviations (Å)        |                 |
| Backbone atoms (residues 1-86)                  | $3.4 \pm 1.0$   |
| Backbone atoms (residues 10-86)                 | $0.8 \pm 0.1$   |
| Heavy atoms (residues 1-86)                     | $3.8 \pm 1.0$   |
| Heavy atoms (residues 10-86)                    | $1.4 \pm 0.1$   |
| Maximum constraint violations                   |                 |
| Distance (Å)                                    | $0.15 \pm 0.05$ |
| Dihedral angles (°)                             | $2.3 \pm 0.7$   |
| Structural quality (Ramachandran plot analysis) |                 |
| Residues in the most favourable regions (%)     | 82.3            |
| Residues in additional allowed regions (%)      | 15.8            |
| Residues in generously allowed regions (%)      | 0.4             |
| Residues in disallowed regions (%)              | 1.5             |

---

**A**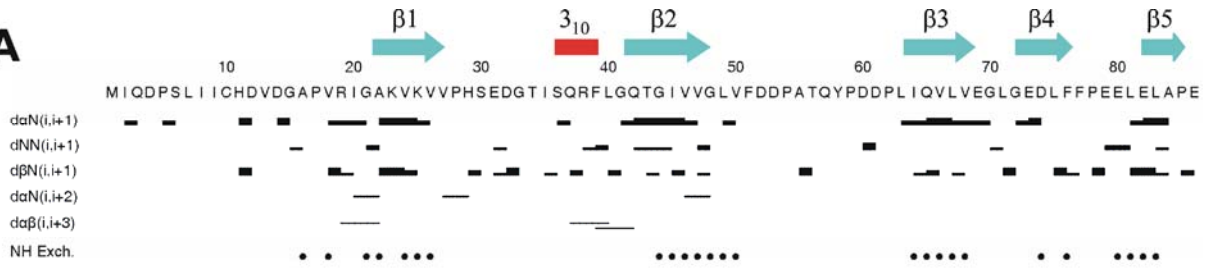**B**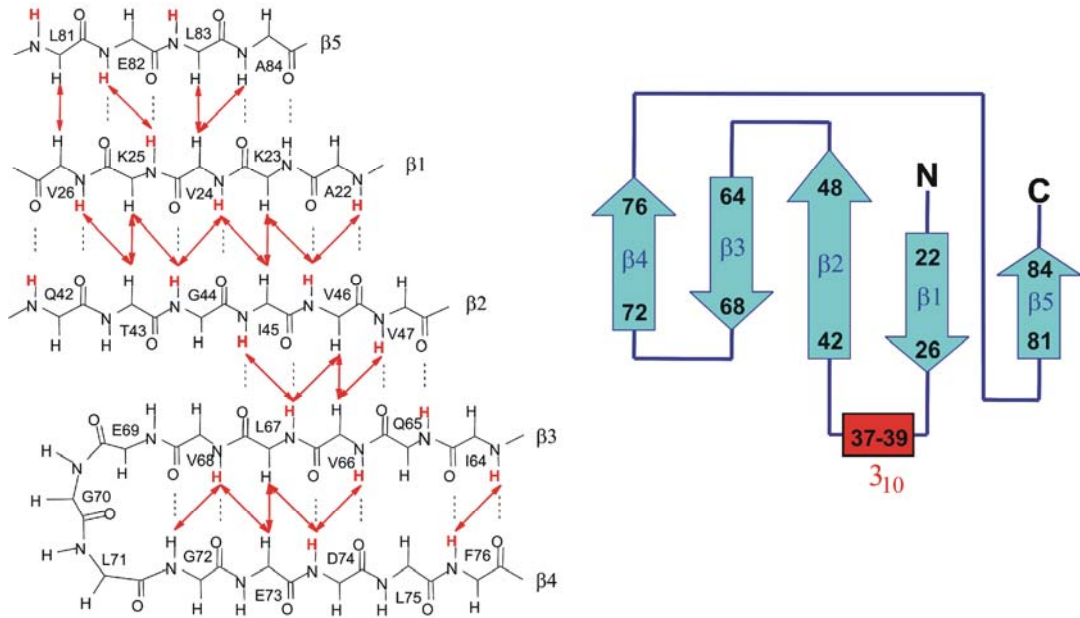**C**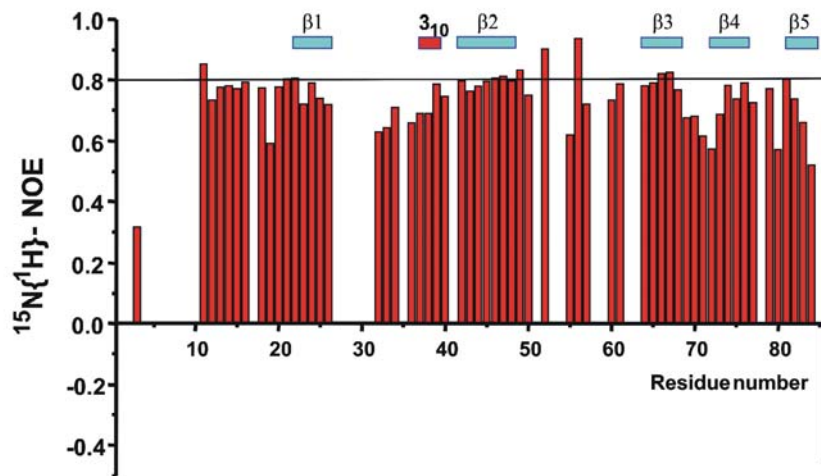**D**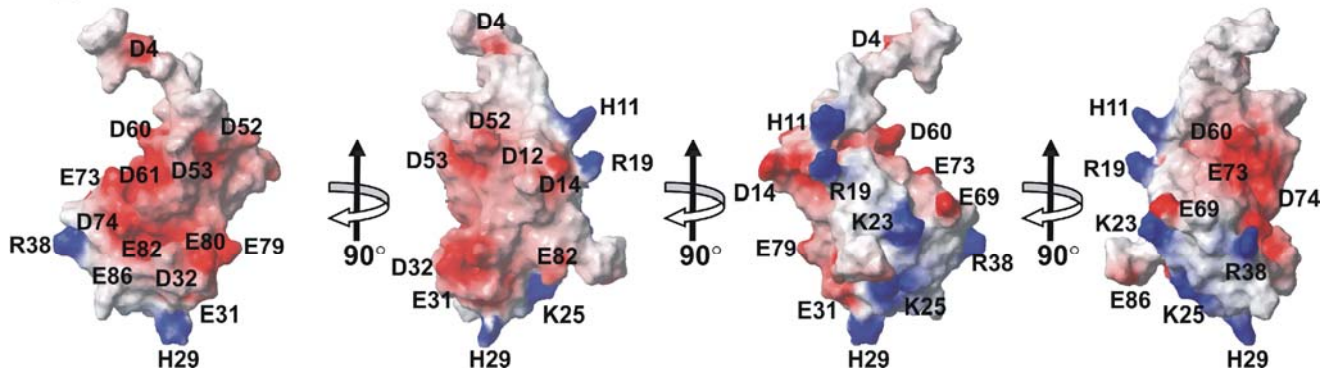

**Supplementary Figure S1.** (A) Summary of NMR data showing sequential and medium range NOEs involving backbone NH and C<sub>α</sub>H, and side chain C<sub>β</sub>H protons relative to residue i. The thickness of the bars scales with weak, medium, and strong NOE intensities. Elements of secondary structure deduced from NMR data are indicated with β-strands as blue arrows and the 3<sub>10</sub>-helix as a red bar. Black dots indicate residues with the slowest amide <sup>1</sup>H exchange (NH/ND) with solvent. (B) Schematics showing the anti-parallel β-sheet topology in CarS1. On the left, non-sequential NOEs are indicated by the red two-headed arrows. Amide <sup>1</sup>H in red are those that exchange slowest with solvent. The arrangement of the anti-parallel β-strands and the 3<sub>10</sub>-helix is shown on the right with delimiting residues numbered. (C) Steady-state heteronuclear <sup>15</sup>N{<sup>1</sup>H}-NOEs for the backbone amides plotted against residue number. Secondary structure elements from the NMR structure are indicated on top as in (A). (D) Four views at 90° clockwise rotations of the electrostatic surface representation of CarS1 showing regions of positive and negative charge, respectively, in blue and red, the color intensity scaling with electrostatic potential, and the charged residues labeled.

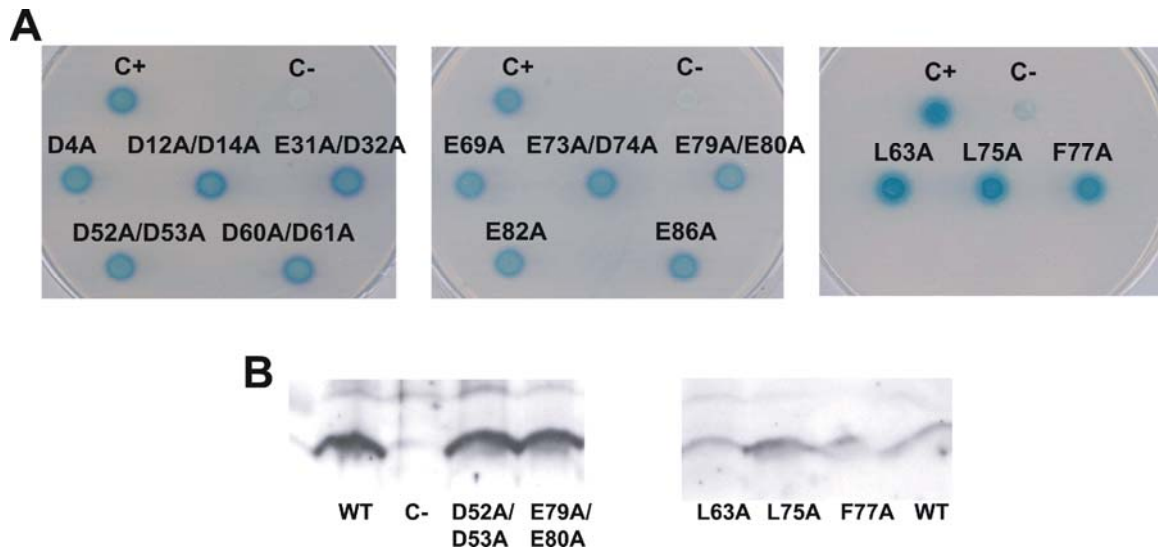

**Supplementary Figure S2.** Analysis of CarS mutants *in vivo*. **(A)** Yeast two-hybrid analysis of the interactions of each CarS mutant with CarA on galactose plates. C+: LexA-CarA and B42-CarS; C-: LexA-CarA only; the rest express LexA-CarA and the indicated B42-CarS\*. **(B)** Western blot analysis using mouse monoclonal anti-CarS antibodies of whole cell extracts of the indicated strains obtained after cell growth in the light. C- is the  $\Delta carS$  strain; the others are derived from introducing the indicated allele into the  $\Delta carS$  strain.

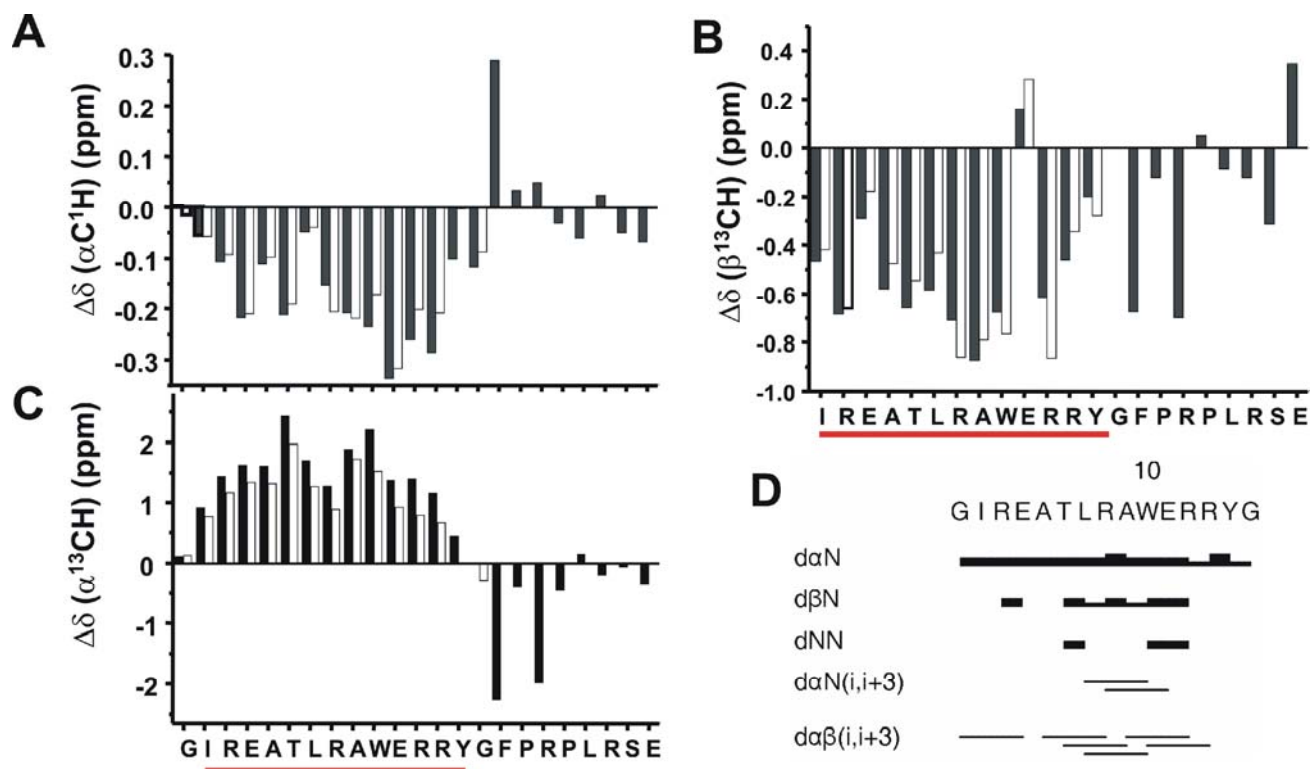

**Supplementary Figure S3.** NMR analysis of peptides corresponding to  $\alpha 2$ , the CarA DNA recognition helix. Deviation ( $\Delta\delta$ ) of the observed chemical shift ( $\delta_{\text{obs}}$ ) for peptides P01 (black bars) and P02 (open bars) from the corresponding random coil value ( $\delta_{\text{rc}}$ ) shown for the  $\alpha\text{C}^1\text{H}$  (A),  $\alpha^{13}\text{CH}$  (B), and  $\beta^{13}\text{CH}$  (C). The helical segment, as inferred from the NMR data, is underlined in red and coincides with  $\alpha 2$  in the high resolution NMR structure determined for CarANt. (D) Summary of medium and short range NOEs for the shorter P02 peptide. NMR spectra were recorded at 5 °C and at pH 6.5.

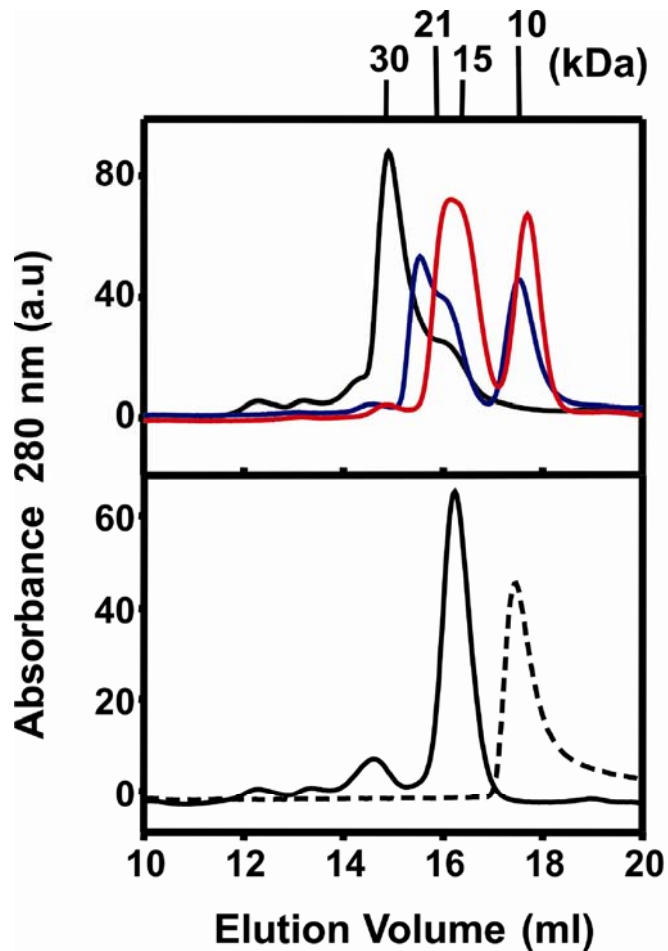

**Supplementary Figure S4.** Effect of ionic strength on stable CarS-CarANt complex formation. The bottom panel shows the elution profiles for pure CarS (solid curve) or pure CarNt (dashed curve) off a Superdex-200 analytical gel filtration column in buffer containing 150 mM NaCl as described in the main text. The top panel shows the elution profiles for mixtures of CarS and CarNt in buffer with NaCl concentration at 150 mM (black curve), 300 mM (blue curve), and 1 M (red curve).  $M_r$  (in kDa) for each peak maximum is indicated. Note that increasing the ionic strength shifts the 30 kDa peak corresponding to the complex towards lower  $M_r$ , with a concomitant rise in the intensities of peaks corresponding to free proteins, indicating that stable complex formation is increasingly hindered by higher ionic strength.





**Supplementary Figure S5.** Sequence alignments of CarS, CarA, and CarH proteins in *M. xanthus* and *S. aurantiaca*. **(A)** Alignment of CarS proteins. Arrows in magenta point to residues important for CarS interaction with CarA in *M. xanthus* identified in this study. **(B)** Alignment of CarA proteins. **(C)** Alignment of CarH proteins. In **(B)** and **(C)** the helix  $\alpha 2$  segment is boxed in red. Identical residues are shaded black and have an asterisk in the “consensus” line below. Similar residues are shaded gray. The *S. aurantiaca* protein sequences are based on our annotation of the genome sequence. We encountered errors in the corresponding genome annotation deposited at NCBI and have commented on it elsewhere (see 6).

## SUPPLEMENTARY REFERENCES

1. Ruiz-Vázquez,R.M.and Murillo,F.J. (1984) Abnormal motility and fruiting behaviour of *Myxococcus xanthus* bacteriophage resistant strains induced by a clear plaque mutant of bacteriophage Mx8. *J. Bacteriol.*, **160**, 818-821.
2. Julien,B., Kaiser,D. and Garza,A. (2000) Spatial control of cell differentiation in *Myxococcus xanthus*. *Proc. Natl. Acad. Sci. USA*, **97**, 9098-9103.
3. Golemis,E.A. and Serebriiskii,I. (2001) In Sambrook,J. and Russell,D.W. (eds.) *Molecular Cloning: A Laboratory Manual* (3rd ed), Cold Spring Harbor Laboratory Press, NY, pp. 18.16-18.47.
4. Cayuela,M.L., Elías-Arnanz,M., Peñalver-Mellado,M., Padmanabhan,S. and Murillo,F.J. (2003) The *Stigmatella auriantica* homolog of *Myxococcus xanthus* HMGA-type transcription factor CarD: insights into the functional modules of CarD and their distribution in bacteria. *J. Bacteriol.*, **185**, 3527-3537.
5. López-Rubio,J.J., Elías-Arnanz,M., Padmanabhan,S. and Murillo,F.J. (2002) A repressor-antirepressor pair links two loci controlling light-induced carotenogenesis in *Myxococcus xanthus*. *J. Biol Chem.*, **277**, 7262-7270.
6. Pérez-Marín,M.C., Padmanabhan,S., Polanco,M.C., Murillo,F.J. and Elías-Arnanz,M. (2008) Vitamin B<sub>12</sub> partners the CarH repressor to downregulate a photoinducible promoter in *Myxococcus xanthus*. *Mol. Microbiol.*, **67**, 804-819.
